# Supplementary material for: C-doped boron nitride fullerene as a novel catalyst for acetylene hydrochlorination: a DFT study
Source: Royal Society of Chemistry journal article supplement (doi:10.1039/c5ra08266h), 2015-01-01
Supplement: c5ra08266h1.pdf [file c5ra08266h1.pdf]

*SUPPORTING INFORMATION*

**C-doped boron nitride fullerene as a novel catalyst  
for acetylene hydrochlorination: a DFT study**

Fei Zhao, Yang Wang, Mingyuan Zhu, Lihua Kang\*

College of Chemistry and Chemical Engineering/ Key Laboratory for  
Green Processing of Chemical Engineering of Xinjiang Bingtuan. Shihezi  
University, Shihezi, Xinjiang, 832000, PR China

\*Corresponding author. E-mail: [kanglihua@shzu.edu.cn](mailto:kanglihua@shzu.edu.cn)

Tel: +86-0993-2057213; Fax: +86-0993-2057270

**Cartesian coordinates, imaginary vibrational modes, energies [in B3LYP/6-31+G(d, p) level of theory] for the key structures involved in this study. Bond lengths are in Å and angles are in °.**

### **Reactant**

**HCl** Energy=-460.796499(a.u.)

| Atom | Bond     | Angle | X        | Y        | Z         |
|------|----------|-------|----------|----------|-----------|
| Cl   |          |       | 0.000000 | 0.000000 | 0.071482  |
| H    | 1.286683 |       | 0.000000 | 0.000000 | -1.215201 |

**C<sub>2</sub>H<sub>2</sub>** Energy=-77.310319(a.u.)

| Atom | Bond     | Angle      | X        | Y        | Z         |
|------|----------|------------|----------|----------|-----------|
| C    |          |            | 0.000000 | 0.000000 | 0.604031  |
| C    | 1.208062 |            | 0.000000 | 0.000000 | -0.604031 |
| H    | 1.066461 | 180.000000 | 0.000000 | 0.000000 | 1.670492  |
| H    | 3.340984 | 0.000000   | 0.000000 | 0.000000 | -1.670492 |

### **Catalysts**

**B<sub>12</sub>N<sub>12</sub>** Energy=-956.036748(a.u.)

| Ato | Bond      | Angle           | X         | Y         | Z         |
|-----|-----------|-----------------|-----------|-----------|-----------|
| m   |           |                 |           |           |           |
| B   |           |                 | 0.000000  | 0.961353  | 1.971396  |
| B   | 1.9227060 |                 | 0.000000  | -0.961353 | 1.971396  |
| B   | 2.4147026 | 66.5389968      | -1.971396 | 0.000000  | 0.961353  |
| B   | 2.4147026 | 60.0000000      | -0.961353 | 1.971396  | 0.000000  |
| B   | 2.4147026 | 66.5389968      | 1.971396  | 0.000000  | 0.961353  |
| B   | 1.9227060 | 114.726598<br>0 | 0.961353  | 1.971396  | 0.000000  |
| B   | 2.4147026 | 98.6309250      | 0.000000  | 0.961353  | -1.971396 |
| B   | 1.9227060 | 114.726598<br>0 | 1.971396  | 0.000000  | -0.961353 |
| B   | 1.9227060 | 114.726598<br>0 | 0.000000  | -0.961353 | -1.971396 |
| B   | 2.4147026 | 114.726598<br>0 | -0.961353 | -1.971396 | 0.000000  |
| B   | 1.9227060 | 66.5389968      | 0.961353  | -1.971396 | 0.000000  |
| N   | 1.4392013 | 35.0217960      | -1.123613 | 0.000000  | 2.124351  |
| N   | 1.4392013 | 125.673420<br>4 | 0.000000  | 2.124351  | 1.123613  |
| N   | 1.4392013 | 35.0217960      | -2.124351 | 1.123613  | 0.000000  |

|   |           |            |           |           |           |
|---|-----------|------------|-----------|-----------|-----------|
| N | 1.4392013 | 94.3195928 | -2.124351 | -1.123613 | 0.000000  |
|   |           | 143.909319 |           |           |           |
| N | 1.4392013 | 6          | 0.000000  | -2.124351 | 1.123613  |
|   |           | 143.909319 |           |           |           |
| N | 1.4392013 | 6          | 2.124351  | 1.123613  | 0.000000  |
| N | 1.4392013 | 35.0217960 | 0.000000  | 2.124351  | -1.123613 |
|   |           | 143.909319 |           |           |           |
| N | 1.4392013 | 6          | 1.123613  | 0.000000  | -2.124351 |
| N | 1.4866408 | 49.7096565 | -1.123613 | 0.000000  | -2.124351 |
|   |           | 143.909319 |           |           |           |
| N | 1.4392013 | 6          | 0.000000  | -2.124351 | -1.123613 |
|   |           | 143.909319 |           |           |           |
| N | 1.4392013 | 6          | 2.124351  | -1.123613 | 0.000000  |
|   |           | 111.227881 |           |           |           |
| B | 1.4392013 | 0          | -1.971396 | 0.000000  | -0.961353 |
| N | 1.4392013 | 35.0217960 | 1.123613  | 0.000000  | 2.124351  |

---

**B<sub>11</sub>N<sub>12</sub>C** Energy=-969.134294(a.u.)

---

| Ato | Bond      | Angle | X         | Y         | Z        |
|-----|-----------|-------|-----------|-----------|----------|
| m   |           |       |           |           |          |
| B   |           |       | -2.307917 | -0.302131 | 0.375770 |
| B   | 2.1029741 |       | -1.075375 | -1.97104  | 0.719402 |

|   |           |            |           |           |           |
|---|-----------|------------|-----------|-----------|-----------|
| B | 2.5756304 | 65.9053932 | -1.084297 | -1.155714 | -1.723759 |
|   |           | 114.095086 |           |           |           |
| B | 2.5756299 | 7          | -1.354935 | 1.375312  | -1.330653 |
| B | 2.5756295 | 65.9054148 | -0.611523 | 0.019271  | 2.287004  |
| B | 2.1029740 | 65.9053755 | -1.118550 | 1.962799  | 0.674710  |
| B | 2.5756300 | 65.9054196 | 1.066998  | 1.971304  | -0.688073 |
|   |           | 114.095100 |           |           |           |
| B | 2.1029744 | 6          | 1.075920  | 1.155978  | 1.755088  |
| B | 2.1029741 | 114.095072 | 2.299540  | 0.302395  | -0.344441 |
|   |           | 114.095097 |           |           |           |
| B | 2.5756295 | 6          | 1.110173  | -1.962535 | -0.643382 |
| B | 2.1029740 | 65.9053754 | 1.346558  | -1.375048 | 1.361981  |
| N | 1.4870269 | 44.9999881 | -1.809839 | -1.430329 | -0.455095 |
| N | 1.4870268 | 44.9999893 | -2.080463 | 1.100702  | -0.062013 |
|   |           | 125.264365 |           |           |           |
| N | 1.4870272 | 2          | -0.856847 | 0.247094  | -2.161533 |
| N | 1.4870279 | 90.0002834 | 0.375696  | -1.421815 | -1.817901 |
|   |           | 106.778799 |           |           |           |
| N | 1.4870274 | 7          | 0.384644  | -2.237145 | 0.625258  |
| N | 1.4870272 | 90.0000091 | -1.573454 | -0.842842 | 1.550268  |
| N | 1.4870272 | 90.0003225 | -0.384073 | 1.422079  | 1.849230  |
| N | 1.4870265 | 45.0000289 | -0.393021 | 2.237409  | -0.593929 |

|   |           |            |          |           |           |
|---|-----------|------------|----------|-----------|-----------|
| N | 1.4870269 | 90.0003446 | 1.801462 | 1.430593  | 0.486424  |
| N | 1.4870272 | 45.0000225 | 1.565077 | 0.843106  | -1.518939 |
| N | 1.4870260 | 45.0000040 | 2.072086 | -1.100438 | 0.093342  |
| N | 1.4870272 | 45.0000176 | 0.848470 | -0.246830 | 2.192862  |
| C | 1.4870272 | 89.9999926 | 0.603146 | -0.019007 | -2.255675 |

---

**B<sub>12</sub>N<sub>11</sub>C** Energy=-939.253191(a.u.)

---

| Ato<br>m | Bond      | Angle      | X         | Y         | Z         |
|----------|-----------|------------|-----------|-----------|-----------|
| B        |           |            | -0.834981 | 0.989420  | 1.886393  |
| B        | 2.0242148 |            | -0.846855 | -1.034549 | 1.857167  |
| B        | 2.4689139 | 65.8069712 | -2.190078 | 0.011701  | 0.068891  |
| B        | 2.4095097 | 60.2833333 | -0.868933 | 1.981953  | -0.353507 |
| B        | 2.5468318 | 66.6000235 | 1.491713  | -0.033468 | 1.723460  |
| B        | 1.9257429 | 114.458803 | 0.884156  | 1.952262  | 0.442912  |
|          |           | 9          |           |           |           |
| B        | 2.4174656 | 98.3918973 | 0.809473  | 0.982635  | -1.777746 |
| B        | 1.9356630 | 112.756033 | 2.194637  | -0.011539 | -0.079928 |
|          |           | 8          |           |           |           |
| B        | 1.9230474 | 114.702666 | 0.798425  | -0.940177 | -1.805734 |
|          |           | 6          |           |           |           |
| B        | 2.4093524 | 100.072444 | -0.891650 | -1.960359 | -0.410737 |

|   |           |            |           |           |           |
|---|-----------|------------|-----------|-----------|-----------|
|   |           | 6          |           |           |           |
|   |           | 114.453078 |           |           |           |
| B | 1.9254963 |            | 0.861205  | -1.973841 | 0.386040  |
|   |           | 7          |           |           |           |
| N | 1.4445523 | 33.5567144 | -1.869584 | -0.010735 | 1.477263  |
|   |           | 123.006950 |           |           |           |
| N | 1.4472011 |            | -0.462681 | 2.120147  | 1.063447  |
|   |           | 1          |           |           |           |
| N | 1.4417832 | 35.0449777 | -1.935694 | 1.147659  | -0.848192 |
| N | 1.4418025 | 35.0476338 | -1.948736 | -1.099915 | -0.880843 |
|   |           | 140.737508 |           |           |           |
| N | 1.4470813 |            | -0.487515 | -2.144847 | 1.001505  |
|   |           | 7          |           |           |           |
|   |           | 144.606468 |           |           |           |
| N | 1.4437146 |            | 1.962821  | 1.099294  | 0.882502  |
|   |           | 0          |           |           |           |
| N | 1.4381922 | 34.8201135 | 0.470386  | 2.128218  | -0.977086 |
|   |           | 146.619226 |           |           |           |
| N | 1.4362070 |            | 1.893905  | 0.010469  | -1.484124 |
|   |           | 3          |           |           |           |
| N | 1.4867781 | 49.7061167 | -0.159429 | 0.035458  | -2.389824 |
|   |           | 143.415139 |           |           |           |
| N | 1.4380348 |            | 0.445909  | -2.104168 | -1.038400 |
|   |           | 0          |           |           |           |
|   |           | 144.625716 |           |           |           |
| N | 1.4436326 |            | 1.949711  | -1.146833 | 0.850031  |
|   |           | 4          |           |           |           |
|   |           | 111.396112 |           |           |           |
| B | 1.4380956 |            | -1.409870 | 0.032537  | -1.679537 |
|   |           | 5          |           |           |           |

|   |           |            |          |           |          |
|---|-----------|------------|----------|-----------|----------|
| C | 1.5458221 | 35.4196640 | 0.166689 | -0.037683 | 2.519613 |
|---|-----------|------------|----------|-----------|----------|

---

### Single adsorption configurations

**C<sub>2</sub>H<sub>2</sub> adsorb on B<sub>12</sub>N<sub>12</sub>** Energy=-1033.348320(a.u.)

---

| Atom | Bond      | Angle       | X         | Y         | Z         |
|------|-----------|-------------|-----------|-----------|-----------|
| B    |           |             | -0.901130 | -1.053173 | 1.332844  |
| B    | 1.9292860 |             | -1.730535 | 0.057934  | -0.008675 |
| B    | 2.4105257 | 66.8175612  | -0.355897 | 1.283256  | 1.566199  |
| B    | 2.4135443 | 60.0683779  | 1.328457  | -0.394038 | 1.984329  |
| B    | 2.4106966 | 66.8096739  | -0.426899 | -1.770124 | -0.919387 |
| B    | 1.9225147 | 114.6315449 | 1.293803  | -1.884437 | 0.770421  |
| B    | 2.4140275 | 66.5396959  | 2.673325  | -0.055947 | 0.008140  |
| B    | 1.9233714 | 114.7141614 | 1.317386  | -1.283744 | -1.567663 |
| B    | 1.9233494 | 114.7331948 | 1.864013  | 1.056793  | -1.335771 |
| B    | 2.4121078 | 98.6143530  | -0.331100 | 1.883541  | -0.769889 |
| B    | 1.9200631 | 114.7516734 | -0.367059 | 0.395455  | -1.982716 |
| N    | 1.4375695 | 35.0322789  | -1.424569 | 0.332580  | 1.422111  |
| N    | 1.4408701 | 125.7442868 | 0.357392  | -1.51330  | 1.862478  |
| N    | 1.4394730 | 35.0898825  | 0.992072  | 0.998378  | 2.126122  |
| N    | 1.4397886 | 35.1266845  | 0.045971  | 2.297799  | 0.556459  |
| N    | 1.4425160 | 142.5586753 | -1.431258 | 0.945055  | -1.106082 |



|   |           |             |           |           |           |
|---|-----------|-------------|-----------|-----------|-----------|
| N | 1.4393424 | 143.9418901 | 0.916312  | -2.296181 | -0.556106 |
| N | 1.4396032 | 35.0640694  | 2.395024  | -0.943631 | 1.106786  |
| N | 1.4400398 | 143.9054373 | 2.388272  | -0.331706 | -1.42434  |
| N | 1.4866980 | 130.9908569 | 2.428315  | 1.410352  | -0.006292 |
| N | 1.4391528 | 143.914505  | 0.605815  | 1.514769  | -1.863366 |
| N | 1.4400472 | 143.8918584 | -0.029934 | -0.997246 | -2.125778 |
| B | 1.4397920 | 111.1869865 | 1.388364  | 1.773307  | 0.920944  |
| N | 1.4383621 | 35.1338412  | -1.467569 | -1.409959 | 0.005909  |
| C | 3.2460675 | 107.4906591 | -4.907170 | -0.609810 | -0.000805 |
| C | 1.2084775 | 81.4849223  | -4.977899 | 0.596587  | 0.003835  |
| H | 1.0667433 | 98.2267338  | -4.839378 | -1.674389 | -0.004938 |
| H | 1.0667656 | 179.7614056 | -5.044754 | 1.661249  | 0.007576  |

---

**HCl adsorb on B<sub>12</sub>N<sub>12</sub>** Energy=-1416.837874(a.u.)

| Ato | Bond      | Angle      | X         | Y         | Z         |
|-----|-----------|------------|-----------|-----------|-----------|
| m   |           |            |           |           |           |
| B   |           |            | 0.167009  | -2.057337 | 0.609281  |
| B   | 1.9244553 |            | 1.072061  | -1.859332 | -1.077492 |
| B   | 2.4134462 | 66.5540633 | -1.115066 | -0.839795 | -1.035751 |
| B   | 2.4145421 | 114.743948 | -1.142682 | -0.144416 | 1.284156  |
|     |           | 8          |           |           |           |
| B   | 2.4150648 | 66.5421334 | 2.364731  | -1.073739 | 0.805162  |

|   |           |            |           |           |           |
|---|-----------|------------|-----------|-----------|-----------|
| B | 1.9202169 | 66.6373131 | 0.553352  | -0.259411 | 2.177172  |
|   |           | 109.574366 |           |           |           |
| B | 2.4139061 | 7          | 0.186581  | 1.859785  | 1.076356  |
|   |           | 114.701692 |           |           |           |
| B | 1.9241841 | 3          | 2.374340  | 0.836909  | 1.032794  |
|   |           | 114.806935 |           |           |           |
| B | 1.9244245 | 0          | 1.091588  | 2.057124  | -0.610484 |
|   |           | 114.750610 |           |           |           |
| B | 2.4140129 | 1          | 0.709672  | 0.259326  | -2.176319 |
|   |           | 66.5805076 |           |           |           |
| B | 1.9216627 | 66.5805076 | 2.405675  | 0.143931  | -1.280191 |
| N | 1.4356500 | 35.0762084 | -0.373686 | -2.041304 | -0.775323 |
|   |           | 125.575582 |           |           |           |
| N | 1.4399060 | 1          | -0.374862 | -1.331585 | 1.728651  |
|   |           | 94.5636039 |           |           |           |
| N | 1.4502910 | 94.5636039 | -1.790048 | 0.012513  | -0.004112 |
| N | 1.4421240 | 94.0995019 | -0.717057 | 0.241354  | -1.966932 |
|   |           | 143.898019 |           |           |           |
| N | 1.4389639 | 4          | 1.622329  | -0.897845 | -1.995841 |
|   |           | 143.932534 |           |           |           |
| N | 1.4378423 | 3          | 1.976812  | -0.242325 | 1.975033  |
|   |           | 34.8444516 |           |           |           |
| N | 1.4393517 | 34.8444516 | -0.364260 | 0.897516  | 1.994150  |
|   |           | 143.815208 |           |           |           |
| N | 1.4402641 | 9          | 1.629393  | 2.042148  | 0.774311  |

|    |           |            |           |           |           |
|----|-----------|------------|-----------|-----------|-----------|
| N  | 1.4865409 | 93.1520084 | -0.352683 | 2.176057  | -0.272336 |
|    |           | 143.811095 |           |           |           |
| N  | 1.4394861 | 7          | 1.632956  | 1.332398  | -1.730222 |
|    |           | 143.824901 |           |           |           |
| N  | 1.4387846 | 2          | 3.031424  | -0.012755 | 0.005884  |
|    |           | 111.439677 |           |           |           |
| B  | 1.4355217 | 8          | -1.105661 | 1.077167  | -0.807301 |
|    |           | 34.9811729 |           |           |           |
| N  | 1.4400619 | 116.445445 | 1.608325  | -2.176691 | 0.271191  |
|    |           | 8          |           |           |           |
| Cl | 3.3107991 | 115.989687 | -5.100822 | -0.000186 | -0.001854 |
|    |           | 1          |           |           |           |
| H  | 2.0045703 |            | -3.794530 | 0.005732  | 0.013433  |

### **C<sub>2</sub>H<sub>2</sub> adsorb on B<sub>11</sub>N<sub>12</sub>C**

**Configuration A** Energy=-1046.485839(a.u.)

| Ato | Bond      | Angle      | X         | Y        | Z         |
|-----|-----------|------------|-----------|----------|-----------|
| m   |           |            |           |          |           |
| B   |           |            | -1.065665 | 1.779615 | -1.117058 |
| B   | 1.9173884 |            | -1.270876 | 0.099999 | -2.018810 |
| B   | 2.3879184 | 66.3537689 | 0.996501  | 0.634606 | -1.494071 |
| B   | 2.3825160 | 99.9128872 | 0.679570  | 1.788743 | 0.566003  |
| B   | 2.4148378 | 66.6199288 | -2.588075 | 0.272954 | -0.001853 |

|   |           |                 |           |           |           |
|---|-----------|-----------------|-----------|-----------|-----------|
| B | 1.9147036 | 114.637653<br>1 | -1.084349 | 1.647023  | 1.297163  |
| B | 2.3504979 | 98.6952169      | 0.438479  | -0.071688 | 1.982164  |
| B | 1.9261770 | 114.681988<br>1 | -1.844985 | -0.637433 | 1.524309  |
| B | 1.9112102 | 114.863420<br>1 | 0.231948  | -1.745125 | 1.082343  |
| B | 2.3485399 | 114.942720<br>3 | 0.263334  | -1.619229 | -1.262610 |
| B | 1.9154923 | 67.4513444      | -1.508376 | -1.814446 | -0.561151 |
| N | 1.4380978 | 35.9186185      | -0.198119 | 1.122338  | -2.128993 |
| N | 1.4393678 | 125.238480<br>4 | -0.604154 | 2.388480  | 0.102807  |
| N | 1.4307631 | 35.1841040      | 1.638574  | 1.144130  | -0.277720 |
| N | 1.4300946 | 93.8558769      | 1.404889  | -0.758526 | -1.297438 |
| N | 1.4392064 | 143.445231<br>3 | -1.057600 | -1.317109 | -1.886020 |
| N | 1.4404876 | 35.0186934      | -2.259336 | 0.904827  | -1.253920 |
| N | 1.4398734 | 142.767691      | -2.238953 | 0.788183  | 1.347350  |
| N | 1.4333202 | 36.6501590      | 0.242778  | 1.345979  | 1.902614  |
| N | 1.4393818 | 144.034065<br>2 | -0.620895 | -1.106276 | 2.118960  |

|   |           |            |           |           |           |
|---|-----------|------------|-----------|-----------|-----------|
| N | 1.4714351 | 91.7914600 | 1.400368  | -0.856065 | 1.191820  |
|   |           | 145.816520 |           |           |           |
| N | 1.4330949 | 7          | -0.216560 | -2.403037 | -0.109191 |
|   |           | 142.744198 |           |           |           |
| N | 1.4400149 | 3          | -2.480093 | -1.179553 | 0.291093  |
|   |           | 121.338446 |           |           |           |
| C | 1.4627882 | 5          | 2.056270  | -0.290898 | 0.012783  |
|   |           | 112.044635 |           |           |           |
| C | 1.5138081 | 1          | 3.553839  | -0.510863 | 0.035531  |
|   |           | 124.733082 |           |           |           |
| C | 1.3121279 | 6          | 4.450914  | 0.443178  | -0.046578 |
|   |           | 113.840915 |           |           |           |
| H | 1.0907435 | 5          | 3.844246  | -1.556715 | 0.143136  |
|   |           | 138.186194 |           |           |           |
| H | 1.0811510 | 7          | 4.475801  | 1.519531  | -0.145231 |

---

**Configuration B** Energy=-1046.485568(a.u.)

---

| Ato | Bond      | Angle      | X         | Y        | Z        |
|-----|-----------|------------|-----------|----------|----------|
| m   |           |            |           |          |          |
| B   |           |            | -1.281016 | 0.039977 | 2.018886 |
| B   | 1.9175083 |            | -1.095610 | 1.743924 | 1.159219 |
| B   | 2.3878341 | 66.3621408 | 0.980338  | 0.615878 | 1.512558 |

|   |           |                 |           |           |           |
|---|-----------|-----------------|-----------|-----------|-----------|
| B | 2.3810249 | 61.1312190      | 0.276206  | -1.640157 | 1.223104  |
| B | 2.4150332 | 66.6165013      | -2.597350 | 0.245583  | 0.004593  |
| B | 1.9154836 | 114.658328<br>6 | -1.491930 | -1.840778 | 0.514215  |
| B | 2.3481687 | 98.7830569      | 0.249910  | -1.709239 | -1.123901 |
| B | 1.9260786 | 114.667793<br>9 | -1.840530 | -0.617762 | -1.541899 |
| B | 1.9108394 | 114.916344<br>1 | 0.436136  | -0.011781 | -1.981376 |
| B | 2.3506458 | 114.898225<br>6 | 0.652963  | 1.816649  | -0.520087 |
| B | 1.9151483 | 67.4342271      | -1.108590 | 1.669712  | -1.257063 |
| N | 1.4387418 | 35.9060839      | -0.222169 | 1.072517  | 2.157101  |
| N | 1.4393514 | 125.273408<br>4 | -1.049532 | -1.370746 | 1.851529  |
| N | 1.429775  | 35.2156107      | 1.407708  | -0.768156 | 1.282887  |
| N | 1.4289162 | 93.7687217      | 1.613605  | 1.160414  | 0.309566  |
| N | 1.4393500 | 143.443214<br>4 | -0.640110 | 2.388079  | -0.044655 |
| N | 1.4404263 | 35.0311308      | -2.278831 | 0.850712  | 1.272344  |
| N | 1.4400343 | 142.777438<br>7 | -2.471132 | -1.198316 | -0.323702 |

|   |           |            |           |           |           |
|---|-----------|------------|-----------|-----------|-----------|
| N | 1.4331529 | 36.7602919 | -0.192125 | -2.402107 | 0.050180  |
|   |           | 144.042277 |           |           |           |
| N | 1.4393286 | 9          | -0.609836 | -1.056318 | -2.145826 |
| N | 1.4719431 | 49.5314985 | 1.407711  | -0.804264 | -1.210254 |
|   |           | 145.648853 |           |           |           |
| N | 1.4329309 | 1          | 0.222384  | 1.400588  | -1.868173 |
|   |           | 142.818593 |           |           |           |
| N | 1.4403232 | 3          | -2.252641 | 0.797788  | -1.330730 |
|   |           | 121.190678 |           |           |           |
| C | 1.4643609 | 4          | 2.053924  | -0.257779 | -0.015216 |
|   |           | 124.155628 |           |           |           |
| C | 2.4995443 | 7          | 4.430242  | 0.512989  | 0.066950  |
| C | 1.3122948 | 29.6346579 | 3.547055  | -0.451636 | -0.040739 |
|   |           | 167.578771 |           |           |           |
| H | 1.0810880 | 2          | 5.505988  | 0.620325  | 0.066093  |
|   |           | 121.157460 |           |           |           |
| H | 1.0954470 | 6          | 3.858834  | -1.493137 | -0.175177 |

**C<sub>2</sub>H<sub>2</sub> adsorb on B<sub>12</sub>N<sub>11</sub>C**

**Configuration C** Energy=-1016.607454(a.u.)

| Ato | Bond | Angle | X | Y | Z |
|-----|------|-------|---|---|---|
| m   |      |       |   |   |   |

|   |           |            |           |           |           |
|---|-----------|------------|-----------|-----------|-----------|
| B |           |            | -1.516133 | 1.141638  | -0.405083 |
| B | 1.9918404 |            | -1.305442 | -0.601812 | -1.344987 |
| B | 2.4619665 | 66.4030790 | 0.432839  | 1.044130  | -1.919907 |
| B | 2.4029267 | 99.7450085 | 0.632594  | 2.178218  | 0.189121  |
| B | 2.4974101 | 66.6229501 | -1.345242 | -0.815768 | 1.142923  |
|   |           | 114.372539 |           |           |           |
| B | 1.9227470 | 4          | -0.226622 | 1.281276  | 1.656840  |
| B | 2.4154275 | 98.3461132 | 2.068703  | 0.589842  | 1.306682  |
|   |           | 113.529523 |           |           |           |
| B | 1.9328950 | 5          | 0.407893  | -1.035685 | 1.926656  |
|   |           | 114.695563 |           |           |           |
| B | 1.9240813 | 1          | 2.264563  | -1.094825 | 0.398043  |
| B | 2.4051539 | 60.5235611 | 1.031822  | -1.271973 | -1.671610 |
|   |           | 114.346455 |           |           |           |
| B | 1.9238763 | 3          | 0.172260  | -2.159814 | -0.197096 |
| N | 1.4423903 | 32.9273619 | -0.973713 | 0.782993  | -1.735764 |
|   |           | 122.118842 |           |           |           |
| N | 1.4466027 | 1          | -0.807715 | 2.015781  | 0.504135  |
| N | 1.4407570 | 35.2083095 | 1.239278  | 1.978881  | -1.102382 |
| N | 1.4407137 | 35.1626898 | 1.465778  | 0.010569  | -2.163976 |
|   |           | 141.520962 |           |           |           |
| N | 1.4459062 | 6          | -0.377821 | -1.700314 | -1.498145 |



|   |           |                 |           |           |           |
|---|-----------|-----------------|-----------|-----------|-----------|
| N | 1.4412569 | 144.171137<br>8 | -0.636606 | -0.004937 | 2.161608  |
| N | 1.4388516 | 34.9085896      | 1.188297  | 1.713807  | 1.485237  |
| N | 1.4359022 | 146.108766<br>8 | 1.816256  | -0.795263 | 1.783387  |
| N | 1.4860991 | 49.6641885      | 2.798362  | 0.249597  | 0.057340  |
| N | 1.4386304 | 143.523512<br>0 | 1.618217  | -1.997935 | -0.516444 |
| N | 1.4416182 | 144.393955<br>5 | -0.411049 | -1.968588 | 1.107299  |
| B | 1.4378912 | 111.436242<br>6 | 2.142906  | 0.797634  | -1.099191 |
| C | 1.5853895 | 39.1462460      | -2.220056 | -0.261919 | -0.057665 |
| C | 2.5207725 | 127.270542<br>0 | -4.647860 | 0.413266  | 0.007042  |
| C | 1.3165652 | 29.3346255      | -3.715432 | -0.515480 | -0.029738 |
| H | 1.0826732 | 109.257769<br>8 | -4.717464 | 1.493286  | 0.036930  |
| H | 1.0923175 | 118.804524<br>5 | -4.018132 | -1.564937 | -0.042786 |

---

## Reaction pathway 1

Co-ads Energy=-1507.286448(a.u.)

| Ato | Bond      | Angle      | X         | Y         | Z         |
|-----|-----------|------------|-----------|-----------|-----------|
| m   |           |            |           |           |           |
| B   |           |            | -1.317137 | 0.528705  | 2.105806  |
| B   | 1.9181589 |            | -0.571745 | 1.973092  | 1.087243  |
| B   | 2.3887011 | 66.3364107 | 0.876135  | 0.082099  | 1.270770  |
| B   | 2.3850378 | 99.8120897 | -0.741601 | -1.670418 | 1.266316  |
| B   | 2.4151098 | 66.6287806 | -2.716498 | 1.224750  | 0.264593  |
| B   | 1.9131276 | 114.759692 | -2.515787 | -1.121940 | 0.806432  |
|     |           | 8          |           |           |           |
| B   | 2.3494101 | 98.8016664 | -1.143812 | -1.782507 | -1.045694 |
| B   | 1.9274531 | 114.619386 | -2.629139 | 0.083730  | -1.286380 |
|     |           | 8          |           |           |           |
| B   | 1.9107094 | 114.831572 | -0.402866 | -0.342570 | -2.059790 |
|     |           | 4          |           |           |           |
| B   | 2.3485153 | 115.009964 | 0.766984  | 1.258877  | -0.801878 |
|     |           | 6          |           |           |           |
| B   | 1.9116134 | 67.5754654 | -0.981793 | 1.853623  | -1.294140 |
| N   | 1.4341928 | 35.8379383 | 0.085164  | 1.017537  | 2.016578  |
| N   | 1.4387541 | 125.176200 | -1.720426 | -0.850409 | 2.032213  |
|     |           | 6          |           |           |           |

|   |           |                 |           |           |           |
|---|-----------|-----------------|-----------|-----------|-----------|
| N | 1.432383  | 34.9232911      | 0.645154  | -1.351785 | 1.101681  |
| N | 1.4419563 | 94.2546466      | 1.511594  | 0.280283  | -0.048786 |
| N | 1.4391572 | 143.324020<br>7 | -0.077919 | 2.332058  | -0.216004 |
| N | 1.4412366 | 34.9763269      | -1.985317 | 1.667112  | 1.425133  |
| N | 1.4391622 | 142.651727<br>1 | -3.250590 | -0.144588 | 0.047462  |
| N | 1.4332244 | 36.6164720      | -1.650759 | -2.190576 | 0.231262  |
| N | 1.4396375 | 144.020359<br>8 | -1.797700 | -0.849493 | -2.000775 |
| N | 1.4712271 | 49.5670965      | 0.257913  | -1.450076 | -1.351757 |
| N | 1.4328122 | 145.740729<br>6 | 0.010445  | 1.029210  | -2.041229 |
| N | 1.4381365 | 142.716952<br>1 | -2.378834 | 1.545911  | -1.146403 |
| C | 1.4599537 | 122.352499<br>3 | 1.236094  | -1.226340 | -0.291300 |
| C | 1.5128149 | 112.104885<br>8 | 2.504497  | -2.021329 | -0.50983  |
| C | 1.3121401 | 124.674725<br>9 | 3.025732  | -2.850320 | 0.363554  |
| H | 1.0908337 | 113.955653      | 2.963971  | -1.862637 | -1.486364 |

|    |           |            |          |           |          |
|----|-----------|------------|----------|-----------|----------|
|    |           | 8          |          |           |          |
| H  | 1.0809644 | 138.528153 | 2.818501 | -3.211749 | 1.361005 |
|    |           | 6          |          |           |          |
| Cl | 3.3450834 | 106.533423 | 4.676190 | 1.359904  | 0.047824 |
|    |           | 4          |          |           |          |
| H  | 2.0434823 | 108.733052 | 3.469567 | 0.860456  | 0.025786 |
|    |           | 2          |          |           |          |

**Ts1** Energy=-1507.228954 (a.u.) ,  $\nu=-1058.17\text{cm}^{-1}$

| Ato | Bond      | Angle      | X         | Y         | Z         |
|-----|-----------|------------|-----------|-----------|-----------|
| m   |           |            |           |           |           |
| B   |           |            | -1.418735 | 0.565193  | 2.092942  |
| B   | 1.9186339 |            | -0.722843 | 2.031768  | 1.070177  |
| B   | 2.3872762 | 66.3298824 | 0.810696  | 0.217472  | 1.313317  |
| B   | 2.3867503 | 61.0510621 | -0.718275 | -1.615155 | 1.295910  |
| B   | 2.4157701 | 66.6318202 | -2.810647 | 1.167970  | 0.212733  |
| B   | 1.9136799 | 114.691355 | -2.506693 | -1.159375 | 0.789949  |
|     |           | 2          |           |           |           |
| B   | 2.3521163 | 98.8850619 | -1.066133 | -1.776030 | -1.024772 |
| B   | 1.9264694 | 114.618260 | -2.632983 | 0.014216  | -1.319772 |
|     |           | 7          |           |           |           |
| B   | 1.9134888 | 114.774134 | -0.372912 | -0.311679 | -2.042888 |

|   |           |            |           |           |           |  |
|---|-----------|------------|-----------|-----------|-----------|--|
|   |           | 3          |           |           |           |  |
|   |           | 115.001369 |           |           |           |  |
| B | 2.3520286 |            | 0.694931  | 1.360236  | -0.779381 |  |
|   |           | 1          |           |           |           |  |
| B | 1.9143314 | 67.4158774 | -1.072746 | 1.861248  | -1.316940 |  |
| N | 1.4334192 | 35.8817503 | -0.041840 | 1.120777  | 2.028798  |  |
|   |           | 125.118628 |           |           |           |  |
| N | 1.4398885 |            | -1.751155 | -0.834261 | 2.027335  |  |
|   |           | 0          |           |           |           |  |
| N | 1.4351903 | 35.3276769 | 0.660187  | -1.238980 | 1.161351  |  |
| N | 1.4333536 | 93.7734029 | 1.443621  | 0.422387  | 0.004459  |  |
|   |           | 143.318890 |           |           |           |  |
| N | 1.4393894 |            | -0.218042 | 2.397650  | -0.227185 |  |
|   |           | 0          |           |           |           |  |
| N | 1.4404981 | 34.9376696 | -2.127202 | 1.659535  | 1.381622  |  |
|   |           | 142.705311 |           |           |           |  |
| N | 1.4386030 |            | -3.271547 | -0.229864 | 0.002176  |  |
|   |           | 4          |           |           |           |  |
| N | 1.4317866 | 36.5088204 | -1.576449 | -2.191247 | 0.246914  |  |
|   |           | 143.990994 |           |           |           |  |
| N | 1.4412515 |            | -1.739692 | -0.886784 | -2.003465 |  |
|   |           | 5          |           |           |           |  |
| N | 1.4763362 | 91.8157823 | 0.328681  | -1.384110 | -1.308429 |  |
|   |           | 145.744366 |           |           |           |  |
| N | 1.4311791 |            | -0.025918 | 1.076762  | -2.032863 |  |
|   |           | 0          |           |           |           |  |
|   |           | 142.768618 |           |           |           |  |
| N | 1.4386690 |            | -2.456465 | 1.486793  | -1.194982 |  |
|   |           | 6          |           |           |           |  |

|    |           |                 |          |           |           |
|----|-----------|-----------------|----------|-----------|-----------|
| C  | 1.4575896 | 120.874702<br>8 | 1.253937 | -1.075490 | -0.225275 |
| C  | 1.5214458 | 110.570725<br>9 | 2.577397 | -1.797312 | -0.430760 |
| C  | 1.3705556 | 125.353973<br>9 | 3.090360 | -2.763430 | 0.395017  |
| H  | 1.0912667 | 114.229770<br>3 | 3.064329 | -1.577610 | -1.382333 |
| H  | 1.0867981 | 122.615296<br>1 | 2.640044 | -3.016156 | 1.351299  |
| Cl | 2.4176414 | 107.421311<br>5 | 5.287418 | -2.030817 | 1.088706  |
| H  | 1.3550142 | 118.348386<br>7 | 3.606397 | -1.503412 | 0.400411  |

---

**De-ads** Energy=-1507.327953(a.u.)

---

| Ato | Bond      | Angle      | X         | Y         | Z         |
|-----|-----------|------------|-----------|-----------|-----------|
| m   |           |            |           |           |           |
| B   |           |            | 1.455745  | 1.491370  | 1.552003  |
| B   | 1.9174703 |            | 2.106616  | -0.29219  | 1.820281  |
| B   | 2.3866875 | 66.3248085 | -0.274781 | -0.138209 | 1.766547  |
| B   | 2.3809332 | 61.1469295 | -0.541360 | 1.619077  | 0.182336  |
| B   | 2.4149728 | 66.6235197 | 2.988066  | 0.761983  | -0.166159 |

|   |           |                 |           |           |           |
|---|-----------|-----------------|-----------|-----------|-----------|
| B | 1.9156455 | 114.543973<br>2 | 1.060131  | 2.095434  | -0.754685 |
| B | 2.3502049 | 98.6174561      | -0.242707 | 0.368150  | -1.784756 |
| B | 1.9261637 | 114.623617<br>5 | 2.147852  | 0.209670  | -1.809052 |
| B | 1.9087463 | 114.909334<br>5 | 0.404962  | -1.40740  | -1.517811 |
| B | 2.3505645 | 114.980043<br>5 | 0.778677  | -2.000897 | 0.725680  |
| B | 1.9157412 | 67.4279323      | 2.400343  | -1.581037 | -0.203826 |
| N | 1.4380196 | 35.9752077      | 0.912396  | 0.386950  | 2.385190  |
| N | 1.4388818 | 125.286835<br>9 | 0.683923  | 2.320038  | 0.664320  |
| N | 1.4298043 | 35.1155352      | -1.202242 | 0.553209  | 0.868995  |
| N | 1.4305621 | 93.8234230      | -0.470022 | -1.466661 | 1.174958  |
| N | 1.4396328 | 143.421885<br>6 | 2.118983  | -1.615737 | 1.254054  |
| N | 1.4404536 | 35.0391436      | 2.787458  | 0.901436  | 1.253424  |
| N | 1.4404963 | 142.746347<br>9 | 2.316931  | 1.566795  | -1.219469 |
| N | 1.4325859 | 36.6730754      | -0.282458 | 1.703339  | -1.267076 |
| N | 1.4395038 | 144.055516      | 0.935245  | -0.317693 | -2.377949 |

|    |           |            |           |           |           |
|----|-----------|------------|-----------|-----------|-----------|
|    |           | 4          |           |           |           |
| N  | 1.4724466 | 49.6209134 | -0.900943 | -0.809511 | -1.193404 |
|    |           | 145.785406 |           |           |           |
| N  | 1.4331342 | 8          | 1.167480  | -2.275857 | -0.670331 |
|    |           | 142.824529 |           |           |           |
| N  | 1.4397334 | 9          | 3.078886  | -0.523457 | -0.906632 |
|    |           | 121.475675 |           |           |           |
| C  | 1.4630043 | 8          | -1.413017 | -0.790241 | 0.176921  |
|    |           | 112.971627 |           |           |           |
| C  | 1.5360719 | 9          | -2.848598 | -1.325293 | 0.288022  |
|    |           | 114.459675 |           |           |           |
| C  | 1.4881498 | 1          | -3.843889 | -0.596692 | -0.544520 |
|    |           | 108.201922 |           |           |           |
| H  | 1.0937945 | 5          | -3.137829 | -1.311130 | 1.342788  |
|    |           | 106.297274 |           |           |           |
| H  | 1.0982579 | 5          | -2.813079 | -2.373225 | -0.038700 |
|    |           | 123.310743 |           |           |           |
| H  | 1.0823582 | 0          | -3.900008 | -0.689798 | -1.621405 |
|    |           | 120.759232 |           |           |           |
| Cl | 1.7277955 | 6          | -4.761955 | 0.709282  | 0.116437  |

---



## Reaction pathway 2

Co-ads Energy=-1507.286356(a.u.)

| Ato | Bond      | Angle      | X         | Y         | Z         |
|-----|-----------|------------|-----------|-----------|-----------|
| m   |           |            |           |           |           |
| B   |           |            | -1.251171 | -1.082950 | -1.913855 |
| B   | 1.9182023 |            | -0.381663 | -2.142764 | -0.572121 |
| B   | 2.3874422 | 66.3744166 | 0.873025  | -0.223530 | -1.243729 |
| B   | 2.3821611 | 61.0746791 | -0.907318 | 1.302777  | -1.662605 |
| B   | 2.4151107 | 66.6449007 | -2.602732 | -1.428898 | 0.057531  |
| B   | 1.9141410 | 114.754048 | -2.626345 | 0.713634  | -1.061113 |
|     |           | 6          |           |           |           |
| B   | 2.3476953 | 98.8056419 | -1.355096 | 1.948521  | 0.549675  |
| B   | 1.9274145 | 114.593242 | -2.650605 | 0.068485  | 1.270164  |
|     |           | 7          |           |           |           |
| B   | 1.9107457 | 114.979575 | -0.488257 | 0.896376  | 1.888529  |
|     |           | 7          |           |           |           |
| B   | 2.3499954 | 114.851271 | 0.853958  | -0.845618 | 1.060040  |
|     |           | 5          |           |           |           |
| B   | 1.9131768 | 67.5259634 | -0.835805 | -1.468225 | 1.706033  |
| N   | 1.4348884 | 35.9075011 | 0.189804  | -1.391906 | -1.720186 |
| N   | 1.4390371 | 125.208333 | -1.790324 | 0.223108  | -2.186535 |
|     |           | 7          |           |           |           |

|   |           |            |           |           |           |
|---|-----------|------------|-----------|-----------|-----------|
| N | 1.4313714 | 34.9989602 | 0.500911  | 1.176632  | -1.439440 |
| N | 1.4399876 | 94.2053349 | 1.503667  | -0.019360 | 0.075794  |
| N | 1.4385636 | 143.309511 | 0.126266  | -2.110454 | 0.773401  |
|   |           | 7          |           |           |           |
| N | 1.4406556 | 34.9932678 | -1.814362 | -2.074199 | -0.961070 |
| N | 1.4395028 | 142.634023 | -3.272317 | -0.108463 | -0.071646 |
|   |           | 9          |           |           |           |
| N | 1.4326650 | 36.7246661 | -1.880774 | 1.974198  | -0.782816 |
| N | 1.4398010 | 144.069040 | -1.926730 | 1.229823  | 1.717742  |
|   |           | 8          |           |           |           |
| N | 1.4705801 | 49.5613302 | 0.067816  | 1.848248  | 0.915221  |
| N | 1.4326627 | 145.514370 | 0.058829  | -0.388028 | 2.210283  |
|   |           | 6          |           |           |           |
| N | 1.4393392 | 142.736132 | -2.255365 | -1.348909 | 1.500338  |
|   |           | 2          |           |           |           |
| C | 1.4614492 | 121.658728 | 1.089844  | 1.449108  | -0.050170 |
|   |           | 7          |           |           |           |
| C | 2.5004767 | 123.626429 | 3.497189  | 2.099856  | 0.133135  |
|   |           | 9          |           |           |           |
| C | 1.3113159 | 29.5699288 | 2.243208  | 2.417068  | -0.082405 |
| H | 1.0805451 | 168.430279 | 4.462943  | 2.582574  | 0.176498  |
|   |           | 0          |           |           |           |

|    |           |                 |          |           |           |
|----|-----------|-----------------|----------|-----------|-----------|
| H  | 1.0954825 | 121.197939<br>0 | 1.947249 | 3.450907  | -0.291372 |
| Cl | 3.4334768 | 102.385470<br>0 | 4.666728 | -1.350654 | -0.031278 |
| H  | 2.1673636 | 106.492804<br>9 | 3.582076 | -0.632419 | 0.032905  |

**Ts1** Energy= -1507.207261 (a.u.) ,  $\nu=-2480.00\text{cm}^{-1}$

| Atom | Bond      | Angle           | X         | Y         | Z         |
|------|-----------|-----------------|-----------|-----------|-----------|
| B    |           |                 | -1.345065 | -0.047543 | 2.022589  |
| B    | 1.9179080 |                 | -1.208963 | 1.687863  | 1.217472  |
| B    | 2.3861639 | 66.3509933      | 0.900058  | 0.629281  | 1.580876  |
| B    | 2.3790639 | 61.2048907      | 0.293146  | -1.640700 | 1.208332  |
| B    | 2.4151887 | 66.6193395      | -2.629879 | 0.168996  | -0.011004 |
| B    | 1.9157239 | 114.647608<br>6 | -1.452105 | -1.888279 | 0.458131  |
| B    | 2.3482872 | 98.8192666      | 0.313204  | -1.638018 | -1.139868 |
| B    | 1.9262457 | 114.648914<br>4 | -1.809820 | -0.616633 | -1.566868 |
| B    | 1.9112536 | 114.985601<br>9 | 0.448195  | 0.090546  | -1.944066 |

|   |           |                 |           |           |           |
|---|-----------|-----------------|-----------|-----------|-----------|
| B | 2.3497429 | 114.873175<br>5 | 0.567727  | 1.880201  | -0.426127 |
| B | 1.9152022 | 67.4238580      | -1.173693 | 1.687132  | -1.199548 |
| N | 1.4375555 | 35.9565113      | -0.330159 | 1.020436  | 2.213434  |
| N | 1.4395939 | 125.220728<br>2 | -1.054004 | -1.442391 | 1.817374  |
| N | 1.4304756 | 35.2596218      | 1.388719  | -0.727632 | 1.319179  |
| N | 1.4310173 | 93.7807326      | 1.534452  | 1.232844  | 0.407049  |
| N | 1.4391915 | 143.435370<br>3 | -0.755258 | 2.384853  | 0.042896  |
| N | 1.4404428 | 35.0147174      | -2.358511 | 0.746967  | 1.280191  |
| N | 1.4400193 | 142.754327<br>8 | -2.439628 | -1.258501 | -0.379624 |
| N | 1.4328493 | 36.7435849      | -0.121831 | -2.383587 | 0.003779  |
| N | 1.4393465 | 144.099716<br>0 | -0.55205  | -0.989012 | -2.159377 |
| N | 1.4716745 | 49.5134990      | 1.434960  | -0.685867 | -1.176405 |
| N | 1.4323218 | 145.605845<br>6 | 0.177312  | 1.488869  | -1.792868 |
| N | 1.4403769 | 142.884940<br>9 | -2.281359 | 0.774568  | -1.321976 |
| C | 1.4656253 | 121.335279      | 2.041593  | -0.151066 | 0.045905  |

|    |           |            |          |           |           |
|----|-----------|------------|----------|-----------|-----------|
|    |           | 7          |          |           |           |
| C  | 2.5888842 | 121.449226 | 4.544083 | 0.506004  | 0.136039  |
|    |           | 2          |          |           |           |
| C  | 1.3284190 | 25.3546240 | 3.529287 | -0.346209 | 0.043200  |
|    |           | 151.194042 |          |           |           |
| H  | 1.0828683 | 7          | 5.594326 | 0.242625  | 0.151034  |
|    |           | 115.861523 |          |           |           |
| H  | 1.0931537 | 5          | 3.799791 | -1.398178 | -0.079982 |
|    |           | 103.207399 |          |           |           |
| Cl | 1.9882339 | 2          | 4.494371 | 2.404379  | 0.724915  |
|    |           | 80.8574063 |          |           |           |
| H  | 2.4245504 | 3.603441   | 2.654783 | -0.477464 |           |

**Ims1** Energy=-1507.258448(a.u.)

| Ato | Bond      | Angle      | X         | Y         | Z         |
|-----|-----------|------------|-----------|-----------|-----------|
| m   |           |            |           |           |           |
| B   |           |            | 1.870501  | -0.257995 | -1.954416 |
| B   | 1.9168790 |            | 1.225437  | 1.509693  | -1.588907 |
| B   | 2.3877552 | 66.3522943 | -0.492672 | -0.148726 | -1.630613 |
| B   | 2.3808723 | 61.1020536 | 0.706316  | -2.002370 | -0.738994 |
| B   | 2.4153810 | 66.6340818 | 2.957021  | 0.787080  | -0.067260 |
|     |           | 114.679320 |           |           |           |
| B   | 1.9148175 | 5          | 2.416268  | -1.565853 | 0.004002  |

|   |           |            |           |           |           |
|---|-----------|------------|-----------|-----------|-----------|
| B | 2.3492801 | 98.7707086 | 0.583068  | -1.445930 | 1.540107  |
|   |           | 114.652939 |           |           |           |
| B | 1.9265790 | 3          | 2.320041  | 0.199511  | 1.653416  |
|   |           | 114.954395 |           |           |           |
| B | 1.9112124 | 9          | -0.060609 | 0.315978  | 1.906294  |
|   |           | 114.822898 |           |           |           |
| B | 2.3489768 | 0          | -0.603232 | 1.582791  | 0.004075  |
|   |           | 67.4606952 |           |           |           |
| B | 1.9153660 | 67.4606952 | 1.087030  | 2.076748  | 0.757499  |
| N | 1.4382097 | 35.9134883 | 0.608552  | 0.406549  | -2.370493 |
|   |           | 125.275092 |           |           |           |
| N | 1.4394318 | 7          | 1.970181  | -1.587691 | -1.412257 |
|   |           | 35.2271971 |           |           |           |
| N | 1.4300648 | 35.2271971 | -0.593553 | -1.486282 | -1.037455 |
| N | 1.4299039 | 93.7440612 | -1.318360 | 0.513101  | -0.619608 |
|   |           | 143.403402 |           |           |           |
| N | 1.4387878 | 8          | 0.546565  | 2.311287  | -0.605703 |
|   |           | 34.9981187 |           |           |           |
| N | 1.4405795 | 34.9981187 | 2.591967  | 0.940368  | -1.452362 |
|   |           | 142.801555 |           |           |           |
| N | 1.4395542 | 5          | 3.153361  | -0.505212 | 0.639652  |
|   |           | 36.7085964 |           |           |           |
| N | 1.4330676 | 36.7085964 | 1.257127  | -2.290035 | 0.598399  |
|   |           | 144.042813 |           |           |           |
| N | 1.4397251 | 1          | 1.189494  | -0.357219 | 2.349637  |
|   |           | 91.8611701 |           |           |           |
| N | 1.4723399 | 91.8611701 | -0.760212 | -0.866113 | 1.375195  |

|    |           |                 |           |           |           |
|----|-----------|-----------------|-----------|-----------|-----------|
| N  | 1.4322768 | 145.600652<br>0 | -0.181104 | 1.655990  | 1.415106  |
| N  | 1.4404504 | 142.784953<br>7 | 2.397866  | 1.566394  | 1.067572  |
| C  | 1.4668859 | 121.800673<br>7 | -1.433549 | -0.833711 | 0.072382  |
| C  | 2.5883621 | 117.356196<br>8 | -4.020257 | -0.926118 | 0.067783  |
| C  | 1.3326607 | 25.5903525      | -2.798868 | -1.453185 | 0.147745  |
| H  | 1.0835898 | 146.333971<br>9 | -4.900555 | -1.550479 | 0.164817  |
| H  | 1.0883780 | 115.640775<br>7 | -2.759707 | -2.527067 | 0.320402  |
| Cl | 1.7454193 | 102.045642<br>1 | -4.444271 | 0.751578  | -0.160333 |
| H  | 3.5090357 | 95.5925728      | -3.350113 | 3.216223  | 1.453170  |

**Ts2** Energy=-1507.256224 (a.u.),  $\nu=-475.15\text{cm}^{-1}$

| Atom | Bond      | Angle      | X         | Y         | Z        |
|------|-----------|------------|-----------|-----------|----------|
| B    |           |            | -1.610117 | -0.110856 | 1.952331 |
| B    | 1.9170465 |            | -1.549099 | 1.538700  | 0.977493 |
| B    | 2.3864789 | 66.3581934 | 0.595936  | 0.549471  | 1.325769 |

|   |           |             |           |           |           |
|---|-----------|-------------|-----------|-----------|-----------|
| B | 2.3816038 | 61.1774217  | 0.010710  | -1.756135 | 1.208601  |
| B | 2.4147189 | 66.6290465  | -3.004866 | -0.110965 | -0.018847 |
| B | 1.9153897 | 114.5987656 | -1.767011 | -2.096647 | 0.582121  |
| B | 2.3487377 | 98.8201875  | -0.095092 | -1.982610 | -1.126797 |
| B | 1.9261134 | 114.7175524 | -2.256855 | -1.034340 | -1.534687 |
| B | 1.9108261 | 114.9425248 | -0.034877 | -0.338897 | -2.099339 |
| B | 2.3459965 | 114.8416802 | 0.133035  | 1.587039  | -0.770326 |
| B | 1.9152040 | 67.5048779  | -1.643356 | 1.302651  | -1.427262 |
| N | 1.4376284 | 35.9349930  | -0.606388 | 0.983571  | 1.983606  |
| N | 1.4395242 | 125.2481851 | -1.305576 | -1.515260 | 1.867867  |
| N | 1.4290573 | 35.1748235  | 1.091257  | -0.821771 | 1.168767  |
| N | 1.4283958 | 93.9661201  | 1.155914  | 1.042077  | 0.064569  |
| N | 1.4392106 | 143.3671944 | -1.171383 | 2.122177  | -0.282750 |
| N | 1.4400946 | 35.0364826  | -2.676769 | 0.593771  | 1.193412  |
| N | 1.4400784 | 142.8293295 | -2.809528 | -1.564847 | -0.257029 |
| N | 1.4328792 | 36.7463108  | -0.455289 | -2.618171 | 0.105868  |
| N | 1.4398396 | 143.9775501 | -1.024771 | -1.446783 | -2.155169 |
| N | 1.4726429 | 91.8172678  | 1.007138  | -1.024622 | -1.316600 |
| N | 1.4319069 | 145.7269459 | -0.321979 | 1.063656  | -2.071501 |
| N | 1.4405570 | 142.7048793 | -2.739340 | 0.368153  | -1.400115 |
| C | 1.4633837 | 121.8030568 | 1.667487  | -0.374487 | -0.184012 |
| C | 2.5800359 | 134.5005491 | 4.124613  | -0.042407 | 0.529318  |



|    |           |             |          |           |           |
|----|-----------|-------------|----------|-----------|-----------|
| C  | 1.3433450 | 26.9944765  | 3.168655 | -0.518832 | -0.285384 |
| H  | 1.0834961 | 148.0054415 | 5.168295 | -0.287097 | 0.371779  |
| H  | 1.0859936 | 115.8029033 | 3.499243 | -1.229327 | -1.037242 |
| Cl | 1.7367350 | 99.7757783  | 3.898175 | 1.029634  | 1.876798  |
| H  | 2.1678834 | 102.2988503 | 3.291349 | 0.828956  | -1.978940 |

**De-ads** Energy=-1507.327953(a.u.)

| Atom | Bond      | Angle      | X         | Y         | Z         |
|------|-----------|------------|-----------|-----------|-----------|
| B    |           |            | 1.455745  | 1.491370  | 1.552003  |
| B    | 1.9174703 |            | 2.106616  | -0.29219  | 1.820281  |
| B    | 2.3866875 | 66.3248085 | -0.274781 | -0.138209 | 1.766547  |
| B    | 2.3809332 | 61.1469295 | -0.541360 | 1.619077  | 0.182336  |
| B    | 2.4149728 | 66.6235197 | 2.988066  | 0.761983  | -0.166159 |
| B    | 1.9156455 | 114.543973 | 1.060131  | 2.095434  | -0.754685 |
|      |           | 2          |           |           |           |
| B    | 2.3502049 | 98.6174561 | -0.242707 | 0.368150  | -1.784756 |
| B    | 1.9261637 | 114.623617 | 2.147852  | 0.209670  | -1.809052 |
|      |           | 5          |           |           |           |
| B    | 1.9087463 | 114.909334 | 0.404962  | -1.40740  | -1.517811 |
|      |           | 5          |           |           |           |
| B    | 2.3505645 | 114.980043 | 0.778677  | -2.000897 | 0.725680  |

5

|   |           |            |           |           |           |
|---|-----------|------------|-----------|-----------|-----------|
| B | 1.9157412 | 67.4279323 | 2.400343  | -1.581037 | -0.203826 |
| N | 1.4380196 | 35.9752077 | 0.912396  | 0.386950  | 2.385190  |
| N | 1.4388818 | 125.286835 | 0.683923  | 2.320038  | 0.664320  |
|   |           | 9          |           |           |           |
| N | 1.4298043 | 35.1155352 | -1.202242 | 0.553209  | 0.868995  |
| N | 1.4305621 | 93.8234230 | -0.470022 | -1.466661 | 1.174958  |
| N | 1.4396328 | 143.421885 | 2.118983  | -1.615737 | 1.254054  |
|   |           | 6          |           |           |           |
| N | 1.4404536 | 35.0391436 | 2.787458  | 0.901436  | 1.253424  |
| N | 1.4404963 | 142.746347 | 2.316931  | 1.566795  | -1.219469 |
|   |           | 9          |           |           |           |
| N | 1.4325859 | 36.6730754 | -0.282458 | 1.703339  | -1.267076 |
| N | 1.4395038 | 144.055516 | 0.935245  | -0.317693 | -2.377949 |
|   |           | 4          |           |           |           |
| N | 1.4724466 | 49.6209134 | -0.900943 | -0.809511 | -1.193404 |
| N | 1.4331342 | 145.785406 | 1.167480  | -2.275857 | -0.670331 |
|   |           | 8          |           |           |           |
| N | 1.4397334 | 142.824529 | 3.078886  | -0.523457 | -0.906632 |
|   |           | 9          |           |           |           |
| C | 1.4630043 | 121.475675 | -1.413017 | -0.790241 | 0.176921  |
|   |           | 8          |           |           |           |

|    |           |                 |           |           |           |
|----|-----------|-----------------|-----------|-----------|-----------|
| C  | 1.5360719 | 112.971627<br>9 | -2.848598 | -1.325293 | 0.288022  |
| C  | 1.4881498 | 114.459675<br>1 | -3.843889 | -0.596692 | -0.544520 |
| H  | 1.0937945 | 108.201922<br>5 | -3.137829 | -1.311130 | 1.342788  |
| H  | 1.0982579 | 106.297274<br>5 | -2.813079 | -2.373225 | -0.038700 |
| H  | 1.0823582 | 123.310743<br>0 | -3.900008 | -0.689798 | -1.621405 |
| Cl | 1.7277955 | 120.759232<br>6 | -4.761955 | 0.709282  | 0.116437  |

---

### Reaction pathway 3

**Co-ads** Energy=-1477.408310(a.u.)

| Ato<br>m | Bond      | Angle      | X         | Y        | Z         |
|----------|-----------|------------|-----------|----------|-----------|
| B        |           |            | 0.066226  | 1.598603 | -1.145595 |
| B        | 1.9904681 |            | -0.849468 | 2.018671 | 0.571091  |
| B        | 2.4628094 | 66.3773507 | -2.315753 | 0.948857 | -1.093522 |
| B        | 2.4037792 | 99.8128123 | -0.724822 | -0.49294 | -2.174408 |
| B        | 2.4959756 | 66.5827716 | 1.161901  | 0.567102 | 0.849005  |

|   |           |                 |           |           |           |
|---|-----------|-----------------|-----------|-----------|-----------|
| B | 1.9206129 | 114.320245<br>2 | 0.943263  | -0.671979 | -1.239426 |
| B | 2.4169895 | 98.3730467      | -0.724314 | -2.290474 | -0.558639 |
| B | 1.9406592 | 113.452950<br>3 | 0.732515  | -1.310482 | 1.086627  |
| B | 1.9253153 | 114.638283<br>9 | -1.605149 | -1.876698 | 1.102613  |
| B | 2.4050597 | 60.5191908      | -2.526804 | 0.352452  | 1.226838  |
| B | 1.9214377 | 114.390542<br>9 | -0.854107 | 0.171208  | 2.154824  |
| N | 1.4426918 | 32.8888848      | -1.329999 | 1.967167  | -0.823905 |
| N | 1.4465402 | 122.122415<br>3 | 0.388377  | 0.473098  | -1.995263 |
| N | 1.4391664 | 35.1847230      | -2.124155 | -0.200757 | -2.007986 |
| N | 1.4398077 | 35.1438779      | -3.151375 | 0.281561  | -0.068512 |
| N | 1.4457896 | 141.486374<br>2 | -1.553082 | 1.383633  | 1.662861  |
| N | 1.4519738 | 144.964502<br>6 | 1.587333  | -0.632147 | 0.061272  |
| N | 1.4386678 | 34.9165176      | -0.028702 | -1.707375 | -1.674831 |
| N | 1.4321161 | 145.965508<br>7 | -0.219968 | -2.350735 | 0.838421  |

|    |           |            |           |           |           |
|----|-----------|------------|-----------|-----------|-----------|
| N  | 1.4852898 | 93.0025829 | -2.167200 | -2.118858 | -0.250883 |
|    |           | 143.565355 |           |           |           |
| N  | 1.4383261 | 4          | -1.968596 | -0.798489 | 1.982473  |
|    |           | 143.839485 |           |           |           |
| N  | 1.4447646 | 7          | 0.544967  | -0.147274 | 1.985987  |
|    |           | 111.505525 |           |           |           |
| B  | 1.4384097 | 7          | -2.689445 | -0.909610 | -0.828812 |
|    |           | 39.1942481 |           |           |           |
| C  | 1.5813532 | 7          | 0.737193  | 1.974311  | 0.265855  |
|    |           | 128.328946 |           |           |           |
| C  | 2.5211521 | 7          | 2.219749  | 3.895283  | -0.418325 |
|    |           | 29.3879048 |           |           |           |
| C  | 1.3160045 | 4          | 1.641996  | 3.168421  | 0.514274  |
|    |           | 109.486229 |           |           |           |
| H  | 1.0825158 | 4          | 2.291331  | 3.929450  | -1.497931 |
|    |           | 118.894447 |           |           |           |
| H  | 1.0920588 | 6          | 1.805996  | 3.427488  | 1.562406  |
|    |           | 114.107565 |           |           |           |
| Cl | 3.3214086 | 0          | 4.814515  | -1.415408 | 0.001660  |
|    |           | 113.904296 |           |           |           |
| H  | 2.0160147 | 8          | 3.548879  | -1.095407 | 0.016074  |

**Ts1** Energy=-1477.342315 (a.u.),  $\nu$ =-1780.75cm<sup>-1</sup>

| Ato | Bond | Angle | X | Y | Z |
|-----|------|-------|---|---|---|
|-----|------|-------|---|---|---|

| m |           |            |           |           |           |
|---|-----------|------------|-----------|-----------|-----------|
| B |           |            | -1.478432 | 1.121170  | -0.271481 |
| B | 1.9951720 |            | -1.325681 | -0.666144 | -1.144915 |
| B | 2.4635343 | 66.2834950 | 0.324240  | 0.975493  | -1.952250 |
| B | 2.4051455 | 99.7930454 | 0.693964  | 2.215011  | 0.075464  |
| B | 2.4994070 | 66.6535395 | -1.134259 | -0.761056 | 1.345343  |
|   |           | 114.279488 |           |           |           |
| B | 1.9233014 | 8          | -0.012889 | 1.376076  | 1.655222  |
| B | 2.4162932 | 98.2980339 | 2.253592  | 0.700701  | 1.130404  |
|   |           | 113.566883 |           |           |           |
| B | 1.9318562 | 6          | 0.685544  | -0.916695 | 1.974757  |
|   |           | 114.685723 |           |           |           |
| B | 1.9244783 | 9          | 2.395331  | -1.023325 | 0.287041  |
| B | 2.4042433 | 60.4806179 | 0.984031  | -1.316574 | -1.649776 |
|   |           | 114.497874 |           |           |           |
| B | 1.9238176 | 0          | 0.278044  | -2.147397 | -0.064724 |
| N | 1.4434845 | 32.8500895 | -1.055051 | 0.702639  | -1.625517 |
|   |           | 122.370600 |           |           |           |
| N | 1.4451267 | 9          | -0.709316 | 2.047352  | 0.527918  |
| N | 1.4408843 | 35.1362589 | 1.183118  | 1.960325  | -1.255705 |
| N | 1.4404526 | 35.1499209 | 1.348527  | -0.054095 | -2.239855 |
| N | 1.4442668 | 141.384298 | -0.396654 | -1.756536 | -1.328928 |

|    |           |            |           |           |           |
|----|-----------|------------|-----------|-----------|-----------|
|    |           | 0          |           |           |           |
|    |           | 144.194943 |           |           |           |
| N  | 1.4413446 |            | -0.352667 | 0.109709  | 2.253837  |
|    |           | 7          |           |           |           |
| N  | 1.4390598 | 34.8702103 | 1.372150  | 1.819603  | 1.335371  |
|    |           | 146.100798 |           |           |           |
| N  | 1.4353806 |            | 2.069803  | -0.663506 | 1.691844  |
|    |           | 1          |           |           |           |
| N  | 1.4861183 | 49.6480039 | 2.871645  | 0.310347  | -0.163505 |
|    |           | 143.575428 |           |           |           |
| N  | 1.4388349 |            | 1.685367  | -1.978485 | -0.521579 |
|    |           | 5          |           |           |           |
|    |           | 144.193537 |           |           |           |
| N  | 1.4418329 |            | -0.187304 | -1.899414 | 1.277229  |
|    |           | 1          |           |           |           |
|    |           | 111.469094 |           |           |           |
| B  | 1.4375602 |            | 2.104983  | 0.793436  | -1.279495 |
|    |           | 5          |           |           |           |
| C  | 1.5885972 | 39.2828030 | -2.127635 | -0.271970 | 0.206203  |
|    |           | 128.139215 |           |           |           |
| C  | 2.5265470 |            | -4.567404 | 0.347420  | 0.423741  |
|    |           | 5          |           |           |           |
| C  | 1.3125362 | 27.9446625 | -3.593536 | -0.531551 | 0.381999  |
|    |           | 107.920411 |           |           |           |
| H  | 1.0805483 |            | -4.642944 | 1.424103  | 0.372437  |
|    |           | 9          |           |           |           |
|    |           | 114.930116 |           |           |           |
| H  | 1.1080687 |            | -3.912887 | -1.587680 | 0.484091  |
|    |           | 3          |           |           |           |
| Cl | 2.0396914 | 145.184652 | -6.461110 | -0.368415 | 0.672335  |

|             |                           |            |           |           |           |
|-------------|---------------------------|------------|-----------|-----------|-----------|
|             |                           | 3          |           |           |           |
| H           | 2.3644062                 | 104.752306 | -5.695237 | -1.718386 | 0.649251  |
|             |                           | 7          |           |           |           |
| <hr/>       |                           |            |           |           |           |
| <b>Ims1</b> | Energy=-1477.387214(a.u.) |            |           |           |           |
| <hr/>       |                           |            |           |           |           |
| Ato         | Bond                      | Angle      | X         | Y         | Z         |
| m           |                           |            |           |           |           |
| <hr/>       |                           |            |           |           |           |
| B           |                           |            | 0.881479  | -1.213326 | 0.139629  |
| B           | 1.9933767                 |            | 0.654492  | -0.092036 | -1.492773 |
| B           | 2.4624176                 | 66.3636324 | -1.083466 | -1.816568 | -1.230110 |
| B           | 2.4036036                 | 99.8023316 | -1.256064 | -1.861849 | 1.166861  |
| B           | 2.4979135                 | 66.6431559 | 0.719976  | 1.237670  | 0.620794  |
| B           | 1.9235584                 | 114.296815 | -0.384374 | -0.392683 | 2.051047  |
|             |                           | 7          |           |           |           |
| B           | 2.4156055                 | 98.2797749 | -2.685460 | 0.064880  | 1.449159  |
| B           | 1.9322879                 | 113.525573 | -1.025265 | 1.792170  | 1.237560  |
|             |                           | 9          |           |           |           |
| B           | 1.9244106                 | 114.758353 | -2.899102 | 1.147773  | -0.127247 |
|             |                           | 5          |           |           |           |
| B           | 2.4040224                 | 60.5174196 | -1.688945 | 0.356448  | -2.061206 |
| B           | 1.9233442                 | 114.426496 | -0.817853 | 1.820507  | -1.168467 |
|             |                           | 4          |           |           |           |
| N           | 1.4433636                 | 32.8703793 | 0.324426  | -1.499925 | -1.200514 |



|   |           |                 |           |           |           |
|---|-----------|-----------------|-----------|-----------|-----------|
| N | 1.4460351 | 122.198207<br>2 | 0.187204  | -1.573683 | 1.355829  |
| N | 1.4404396 | 35.1763814      | -1.876437 | -2.273526 | -0.066235 |
| N | 1.4403080 | 35.1636064      | -2.122701 | -1.008408 | -1.907873 |
| N | 1.4445714 | 141.455516<br>0 | -0.278790 | 0.815104  | -2.119565 |
| N | 1.4417271 | 144.159567<br>3 | 0.026308  | 0.981603  | 1.905255  |
| N | 1.4386904 | 34.8989955      | -1.798895 | -0.853904 | 2.112234  |
| N | 1.4356465 | 146.121470<br>2 | -2.433744 | 1.514203  | 1.236100  |
| N | 1.4861581 | 93.0838253      | -3.430363 | -0.203230 | 0.191422  |
| N | 1.4390068 | 143.469328<br>1 | -2.265813 | 1.531280  | -1.361187 |
| N | 1.4412653 | 144.284924<br>4 | -0.219649 | 2.245486  | 0.072013  |
| B | 1.4374253 | 111.412191<br>2 | -2.786041 | -1.220647 | -0.593373 |
| C | 1.5880452 | 39.3010024      | 1.589041  | 0.193443  | -0.201522 |
| C | 2.5024367 | 127.756985<br>9 | 3.988239  | -0.421578 | 0.155952  |
| C | 1.3351456 | 29.7596982      | 3.065254  | 0.424703  | -0.307212 |

|    |           |                 |          |           |           |
|----|-----------|-----------------|----------|-----------|-----------|
| H  | 1.0843589 | 94.6688894      | 3.765706 | -1.350548 | 0.669107  |
| H  | 1.0887959 | 118.643761<br>2 | 3.394810 | 1.342046  | -0.792342 |
| Cl | 1.7529938 | 152.589972<br>3 | 5.709619 | -0.130230 | -0.002018 |
| H  | 3.7428718 | 118.486507<br>7 | 2.993035 | 4.206307  | 0.792511  |

---

**Ts2** Energy=-1477.385072 (a.u.),  $\nu=-459.88\text{cm}^{-1}$

---

| Ato<br>m | Bond      | Angle           | X         | Y         | Z         |
|----------|-----------|-----------------|-----------|-----------|-----------|
| B        |           |                 | -0.995686 | 1.089149  | -0.398692 |
| B        | 1.9942369 |                 | -0.803259 | -0.697626 | -1.263208 |
| B        | 2.4652077 | 66.1687217      | 0.818849  | 0.976673  | -2.064917 |
| B        | 2.4053872 | 99.8792684      | 1.148246  | 2.234265  | -0.041097 |
| B        | 2.5052574 | 66.5955575      | -0.625026 | -0.772622 | 1.236158  |
| B        | 1.9234405 | 114.305328<br>1 | 0.449203  | 1.388949  | 1.538904  |
| B        | 2.4161487 | 98.3518136      | 2.733249  | 0.760948  | 1.033555  |
| B        | 1.9328638 | 113.511098<br>7 | 1.195088  | -0.885247 | 1.876832  |
| B        | 1.9245847 | 114.676316      | 2.918639  | -0.964412 | 0.201215  |

|   |           |            |           |           |           |
|---|-----------|------------|-----------|-----------|-----------|
|   |           | 4          |           |           |           |
| B | 2.4046987 | 60.4995061 | 1.526871  | -1.298822 | -1.743353 |
|   |           | 114.486253 |           |           |           |
| B | 1.9228415 | 2          | 0.828075  | -2.134564 | -0.158885 |
|   |           |            |           |           |           |
| N | 1.4422371 | 32.8376369 | -0.555402 | 0.676206  | -1.746795 |
|   |           | 122.434579 |           |           |           |
| N | 1.4458270 | 1          | -0.254315 | 2.037058  | 0.402715  |
|   |           |            |           |           |           |
| N | 1.4403669 | 35.1516495 | 1.651889  | 1.983647  | -1.367065 |
|   |           |            |           |           |           |
| N | 1.4405542 | 35.1568417 | 1.868139  | -0.032090 | -2.338435 |
|   |           | 140.964399 |           |           |           |
| N | 1.4454340 | 5          | 0.154857  | -1.767011 | -1.429668 |
|   |           |            |           |           |           |
|   |           | 144.280115 |           |           |           |
| N | 1.4414296 | 4          | 0.132712  | 0.119776  | 2.144505  |
|   |           |            |           |           |           |
| N | 1.4392274 | 34.8835863 | 1.825950  | 1.861454  | 1.226092  |
|   |           | 146.169091 |           |           |           |
| N | 1.4353315 | 3          | 2.575430  | -0.603680 | 1.601964  |
|   |           |            |           |           |           |
| N | 1.4858859 | 93.0161946 | 3.368437  | 0.377120  | -0.253717 |
|   |           | 143.558369 |           |           |           |
| N | 1.438576  | 2          | 2.235160  | -1.939163 | -0.606385 |
|   |           |            |           |           |           |
|   |           | 144.256915 |           |           |           |
| N | 1.4425349 | 6          | 0.348143  | -1.890005 | 1.179309  |
|   |           |            |           |           |           |
| B | 1.4378445 | 111.456883 | 2.598577  | 0.836738  | -1.377756 |

|    |           |            |           |           |           |
|----|-----------|------------|-----------|-----------|-----------|
|    |           | 8          |           |           |           |
| C  | 1.5871506 | 38.7863577 | -1.616770 | -0.317298 | 0.083695  |
|    |           | 125.663040 |           |           |           |
| C  | 2.5083973 | 4          | -4.022724 | 0.321529  | 0.392471  |
|    |           |            |           |           |           |
| C  | 1.3472865 | 29.9040185 | -3.079213 | -0.622792 | 0.210192  |
| H  | 1.0842285 | 94.1804724 | -3.822106 | 1.387035  | 0.393324  |
|    |           | 118.465986 |           |           |           |
| H  | 1.0882586 | 6          | -3.369865 | -1.668526 | 0.289367  |
|    |           |            |           |           |           |
|    |           | 152.652092 |           |           |           |
| Cl | 1.7443786 | 8          | -5.712349 | -0.058761 | 0.600806  |
|    |           |            |           |           |           |
| H  | 2.0898207 | 99.0052535 | -3.384495 | -1.002222 | -1.822094 |

**De-ads** Energy=-1477.444564(a.u.)

| Atom | Bond      | Angle       | X         | Y         | Z         |
|------|-----------|-------------|-----------|-----------|-----------|
| B    |           |             | 1.245773  | -0.708743 | 0.273461  |
| B    | 1.9943454 |             | 0.895675  | 0.491951  | -1.279980 |
| B    | 2.467820  | 66.3297836  | -0.356003 | -1.633048 | -1.368394 |
| B    | 2.4016403 | 99.7945435  | -0.743744 | -1.976698 | 0.976694  |
| B    | 2.4905883 | 66.5158091  | 0.399260  | 1.546406  | 0.921094  |
| B    | 1.9198577 | 114.4390832 | -0.377650 | -0.445245 | 2.075093  |
| B    | 2.4149881 | 98.3997993  | -2.649647 | -0.516550 | 1.236827  |
| B    | 1.9338856 | 113.9027461 | -1.482497 | 1.583599  | 1.365527  |

|    |           |             |           |           |           |
|----|-----------|-------------|-----------|-----------|-----------|
| B  | 1.9245474 | 114.5576968 | -2.980704 | 0.641646  | -0.264128 |
| B  | 2.4025239 | 60.6608366  | -1.423497 | 0.393049  | -2.094692 |
| B  | 1.9211793 | 114.2504794 | -1.055304 | 1.919518  | -0.987779 |
| N  | 1.4405271 | 32.7467296  | 0.908213  | -0.979998 | -1.143890 |
| N  | 1.4492883 | 121.8137503 | 0.547010  | -1.360051 | 1.363399  |
| N  | 1.4408905 | 35.2751871  | -1.113056 | -2.398033 | -0.350804 |
| N  | 1.4401957 | 35.2684605  | -1.500674 | -1.045051 | -2.103397 |
| N  | 1.449608  | 141.2572499 | -0.183765 | 1.194590  | -1.945165 |
| N  | 1.4424998 | 144.1832051 | -0.326922 | 0.996253  | 2.092867  |
| N  | 1.4384340 | 34.9499420  | -1.623202 | -1.249900 | 1.927986  |
| N  | 1.4360397 | 145.9637478 | -2.763726 | 0.964966  | 1.170705  |
| N  | 1.4856274 | 49.6708712  | -3.171539 | -0.824676 | -0.120704 |
| N  | 1.4387987 | 143.6113113 | -2.353454 | 1.302456  | -1.377694 |
| N  | 1.4415612 | 144.4108536 | -0.712921 | 2.344914  | 0.346354  |
| B  | 1.4384188 | 111.3502831 | -2.208926 | -1.556711 | -0.899517 |
| C  | 1.5827382 | 39.1600023  | 1.585259  | 0.860798  | 0.128372  |
| C  | 1.5582385 | 117.7290322 | 3.013053  | 1.461615  | 0.297282  |
| C  | 1.4888911 | 114.7055604 | 4.084859  | 0.735116  | -0.437720 |
| H  | 1.0979792 | 108.9036387 | 3.264322  | 1.486662  | 1.365830  |
| H  | 1.0969966 | 109.6908747 | 3.022045  | 2.499075  | -0.059085 |
| H  | 1.0839475 | 123.9995112 | 4.393182  | 0.971546  | -1.449639 |
| Cl | 1.7354321 | 118.9225730 | 4.527413  | -0.859801 | 0.083922  |

---

**Product** Energy=-538.153156(a.u.)

---

| Ato<br>m | Bond      | Angle           | X         | Y         | Z         |
|----------|-----------|-----------------|-----------|-----------|-----------|
| C        |           |                 | -1.646061 | -0.284826 | 0.000007  |
| C        | 1.3292864 |                 | -0.575978 | 0.503796  | 0.000013  |
| H        | 1.0855618 | 119.237592<br>7 | -2.634874 | 0.163162  | 0.000025  |
| H        | 1.0846226 | 122.543256<br>6 | -1.573311 | -1.367006 | -0.000013 |
| H        | 1.0838770 | 124.178075<br>5 | -0.617796 | 1.586866  | 0.000034  |
| Cl       | 1.7514107 | 123.450842<br>9 | 1.068131  | -0.099814 | -0.000010 |

---
